# Supplementary material for: GO@β-Ag2MoO4 Composite: One-Step Synthesis, Characterization, and Photocatalytic Performance against RhB Dye
Source: PubMed Central journal article supplement (PMC11613341; doi:10.1021/acsphyschemau.4c00038), 2024-09-10
Supplement: pg4c00038_si_001.pdf [file pg4c00038_si_001.pdf]

## **GO@ $\beta$ -Ag<sub>2</sub>MoO<sub>4</sub> composite: One-step synthesis, characterization, and photocatalytic performance against RhB dye**

Pedro Hyug de Almeida da Silva<sup>1</sup>, Dalete Araújo de Souza<sup>1</sup>, Rubens Lucas de Freitas Filho<sup>2</sup>, Ana Paula de Carvalho Teixeira<sup>2</sup>, Rochel Montero Lago<sup>2</sup>, Walter Ricardo Brito<sup>3</sup>, Edgar Alves Araújo Junior<sup>4</sup>, Litiko Lopes Takeno<sup>5</sup>, Francimauro Sousa Morais<sup>1</sup>, José Fábio de Lima Nascimento<sup>6</sup>, Yurimiler Leyet Ruiz<sup>7</sup>, Libertalamar Brilhaiva Saraiva<sup>1</sup>, and Francisco Xavier Nobre<sup>1,6\*</sup>

<sup>1</sup>*Departamento de Química, Instituto Federal de Educação Ciência e Tecnologia do Amazonas (IFAM), Campus Manaus Centro, 69020-120, Manaus-AM, Brazil.*

<sup>2</sup>*Departamento de Química, ICEX, Universidade Federal de Minas Gerais, 31270-901, Belo Horizonte-MG, Brazil.*

<sup>3</sup>*LABEL - Laboratory of Bioelectronic and Electroanalytic, Central Analytical Lab, Federal University of Amazonas (UFAM), 69077-000, Manaus-AM, Brazil.*

<sup>4</sup>*Laboratório Interdisciplinar de Materiais Avançados (LIMAV), Universidade Federal do Piauí (UFPI), 64049-550, Teresina-PI, Brazil.*

<sup>5</sup>*Departamento Acadêmico de Infraestrutura – DAINFRA, Instituto Federal de Educação Ciência e Tecnologia do Amazonas (IFAM), Campus Manaus Centro, 69020-120, Manaus-AM, Brazil.*

<sup>6</sup>*Laboratório de Ensaio Mecânicos, Automação e Simulação (LEMAS), Polo de Inovação (INOVA) Instituto Federal de Educação Ciência e Tecnologia do Amazonas (IFAM), 69075-351, Manaus-AM, Brazil.*

<sup>7</sup>*Laboratório de Processamento de Materiais (LPMat), Centro de Ciências Exatas, Universidade Federal do Amazonas, 69077-000, Manaus-AM, Brazil.*

*\*Corresponding author: Francisco X. Nobre (francisco.nobre@ifam.edu.br)*

### **Supporting Information**

The lattice parameters obtained through structural refinement using the Rietveld method as shown in Figure S1, revealed that for proportions of graphene oxide and silver molybdate of 1 and 2.5% (m/m), there was an increase in the length of the axes of crystallographic coordinates, resulting, consequently, in an increase in the volume of the unit cell. Therefore, it is suggested that in these proportions, there was an effect of self-assembly and direction of the crystalline domains, resulting from the increase in the volume of the unit cell. However, for the proportions of 5, 7.5 and 10%, there was a reduction in these values compared to the values obtained for the proportions of 1 and 2.5%, due to the reduction in the matter transfer process, caused by the oxide particles. graphene in the reaction medium.

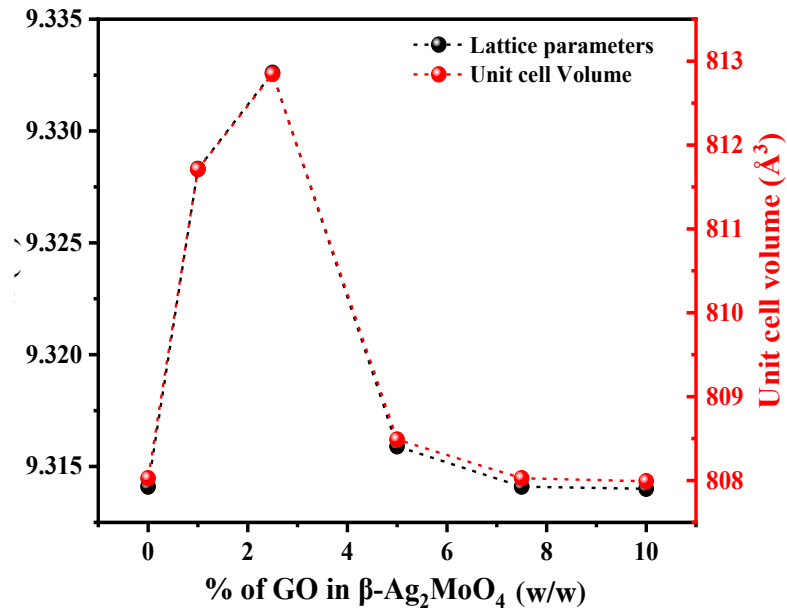

**Figure S1:** Lattice parameters ( $a = b = c$ ) for and unit cell volume for cubic  $\beta\text{-Ag}_2\text{MoO}_4$  for each composite obtained.

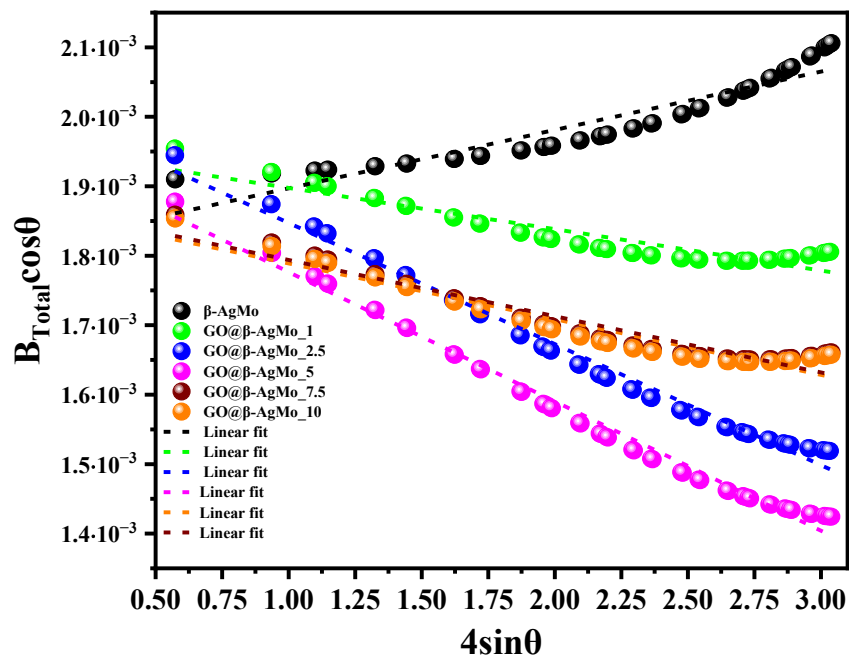

**Figure S2:** Williamson-Hall plot for  $\beta\text{-AgMo}$  and composites (GO@ $\beta\text{-AgMo}_1$ , GO@ $\beta\text{-AgMo}_{2.5}$ , GO@ $\beta\text{-AgMo}_5$ , GO@ $\beta\text{-AgMo}_{7.5}$  and GO@ $\beta\text{-AgMo}_{10}$ ).

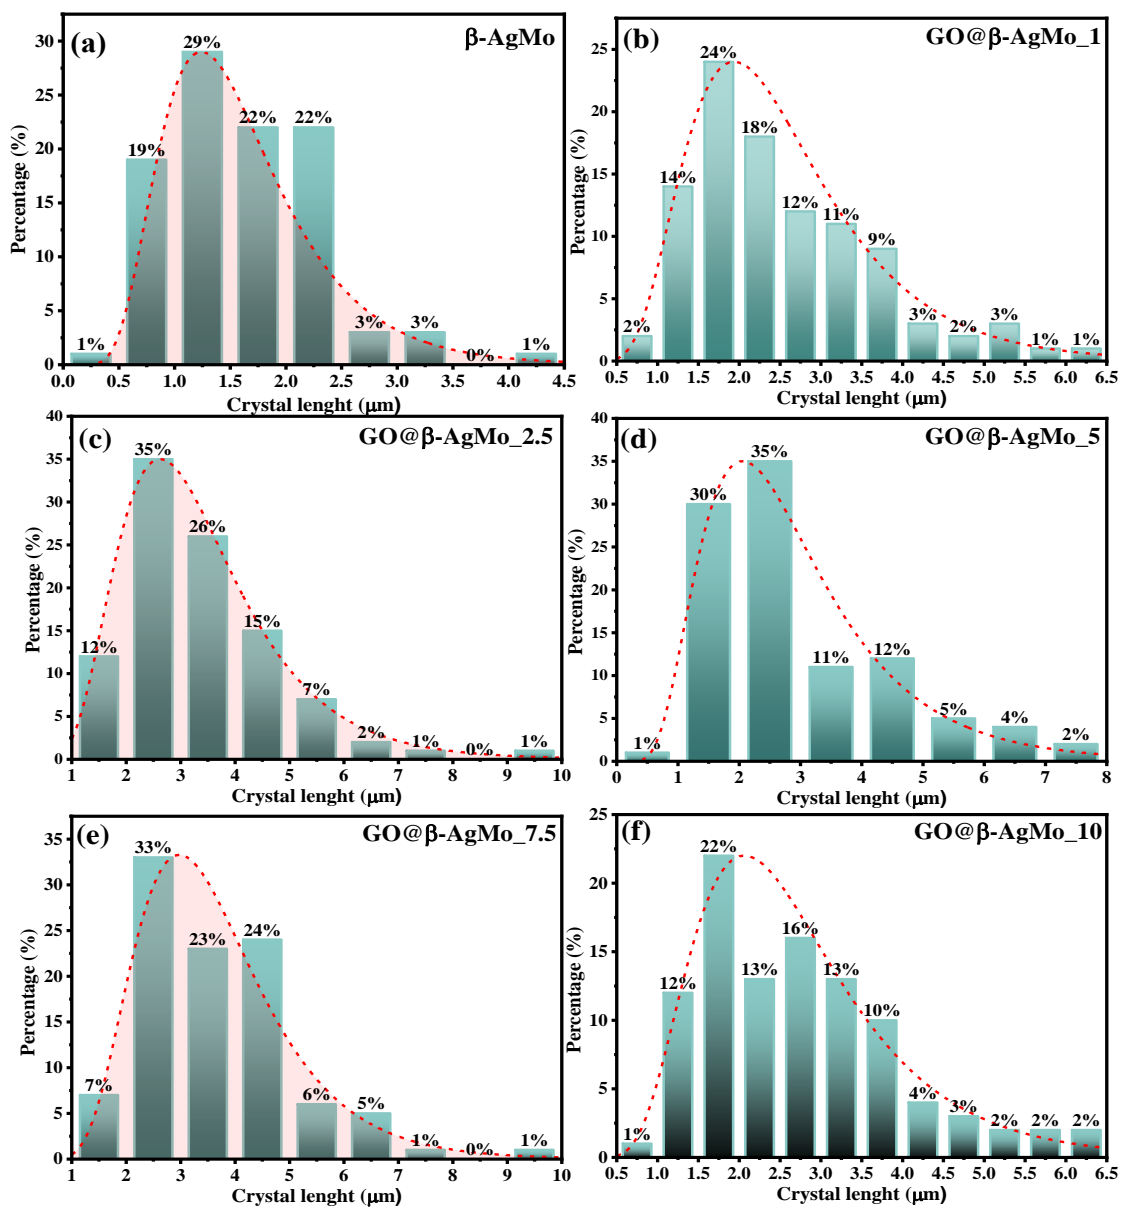

**Figure S3:** Crystal length distribution for  $\beta$ -AgMo and composites (GO@ $\beta$ -AgMo\_1, GO@ $\beta$ -AgMo\_2.5, GO@ $\beta$ -AgMo\_5, GO@ $\beta$ -AgMo\_7.5 and GO@ $\beta$ -AgMo\_10).

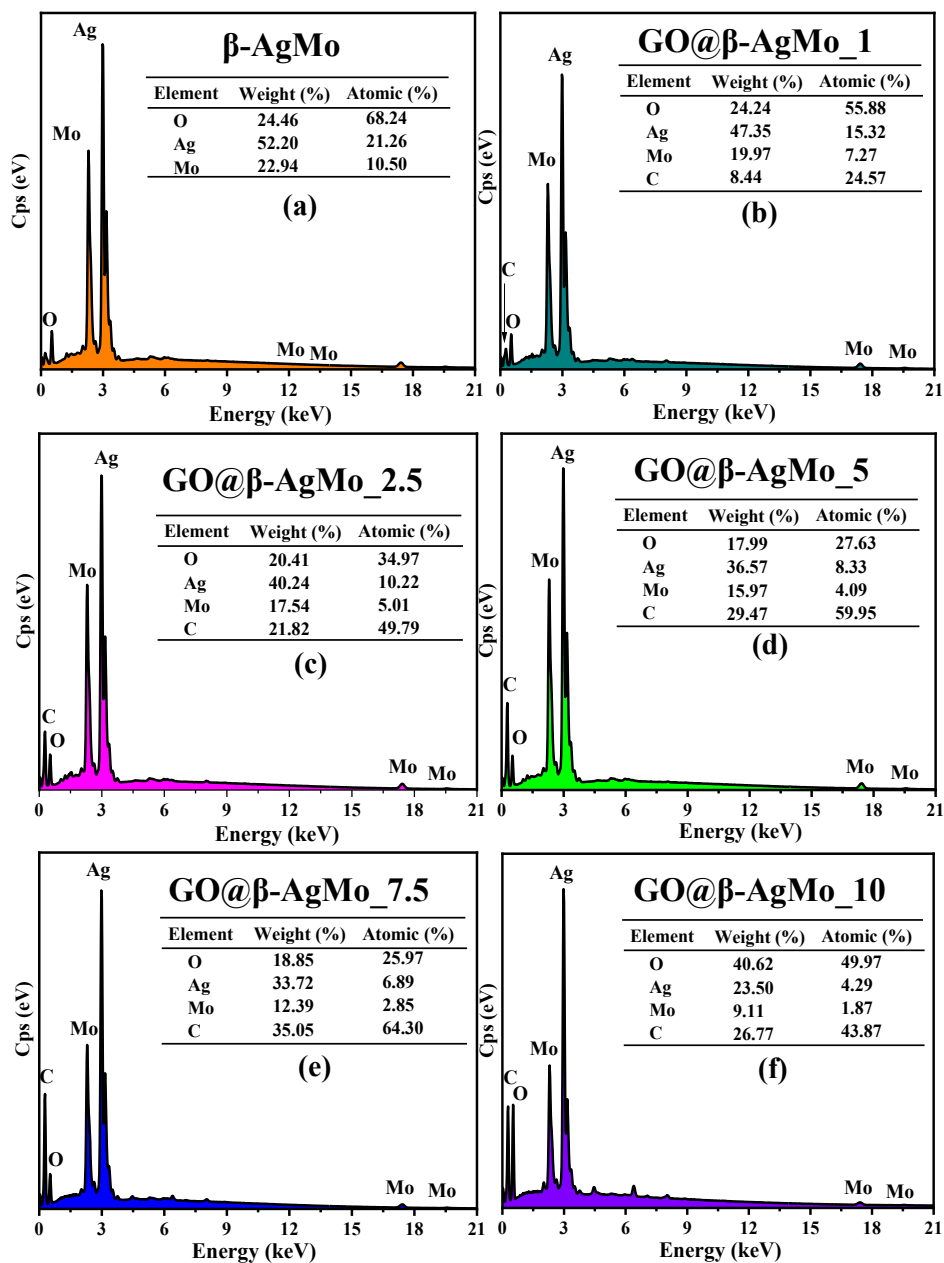

**Figure S4:** Energy dispersive X-ray (EDX) collected for  $\beta$ -AgMo and composites (GO@ $\beta$ -AgMo\_1, GO@ $\beta$ -AgMo\_2.5, GO@ $\beta$ -AgMo\_5, GO@ $\beta$ -AgMo\_7.5 and GO@ $\beta$ -AgMo\_10).

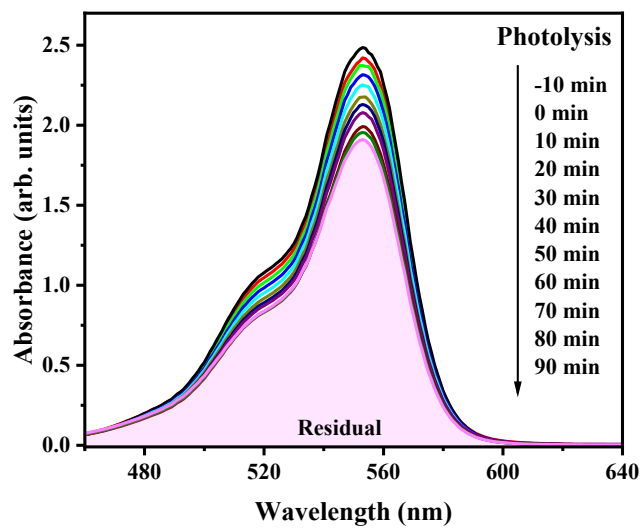

**Figure S5:** UV-vis spectrum of RhB dye solution at different exposure time under UVc light (photolysis).

**Table S1:** Rietveld refinement results for atom, Wyckoff, atomic coordinates ( $x$ ,  $y$ , and  $z$ ), isotropic thermal factor ( $U_{\text{iso}}$ ), and occupancy ( $O_{\text{cc}}$ ) for all synthesized samples, and contained in the ICSD card n° 7222296.

| Atom                                                                                     | Wyckoff | Atomic coordinates |         |         | $U_{\text{iso}}$ | $O_{\text{cc}}$ |
|------------------------------------------------------------------------------------------|---------|--------------------|---------|---------|------------------|-----------------|
|                                                                                          |         | $x$                | $y$     | $z$     |                  |                 |
| $\beta$ -AgMo                                                                            |         |                    |         |         |                  |                 |
| Ag                                                                                       | 16d     | 0.12500            | 0.12500 | 0.12500 | 0                | 0.94532         |
| Mo                                                                                       | 8a      | 0.5                | 0.5     | 0.5     | 0.16128          | 2.41838         |
| O                                                                                        | 32e     | 0.23290            | 0.23290 | 0.23290 | 0.16981          | 4.35454         |
| R_parameters: $R_p = 16.3$ ; $R_{\text{wp}} = 20.1$ ; $R_e = 14.1$ and $\chi^2 = 2.03$ . |         |                    |         |         |                  |                 |
| Atom                                                                                     | Wyckoff | Atomic coordinates |         |         | $U_{\text{iso}}$ | $O_{\text{cc}}$ |
|                                                                                          |         | $x$                | $y$     | $z$     |                  |                 |
| GO@ $\beta$ -AgMo_1                                                                      |         |                    |         |         |                  |                 |
| Ag                                                                                       | 16d     | 0.12500            | 0.12500 | 0.12500 | 0                | 0.66511         |
| Mo                                                                                       | 8a      | 0.5                | 0.5     | 0.5     | 0.69575          | 1.75561         |
| O                                                                                        | 32e     | 0.23098            | 0.23098 | 0.23098 | 0.46763          | 3.21298         |
| R_parameters: $R_p = 15.9$ ; $R_{\text{wp}} = 18.8$ ; $R_e = 11.1$ and $\chi^2 = 2.84$ . |         |                    |         |         |                  |                 |
| Atom                                                                                     | Wyckoff | Atomic coordinates |         |         | $U_{\text{iso}}$ | $O_{\text{cc}}$ |
|                                                                                          |         | $x$                | $y$     | $z$     |                  |                 |
| GO@ $\beta$ -AgMo_2.5                                                                    |         |                    |         |         |                  |                 |
| Ag                                                                                       | 16d     | 0.12500            | 0.12500 | 0.12500 | 0                | 0.66265         |
| Mo                                                                                       | 8a      | 0.5                | 0.5     | 0.5     | 0.69575          | 1.75575         |
| O                                                                                        | 32e     | 0.23215            | 0.23215 | 0.23215 | 0.46763          | 3.21650         |
| R_parameters: $R_p = 17.9$ ; $R_{\text{wp}} = 20.7$ ; $R_e = 12.7$ and $\chi^2 = 2.64$ . |         |                    |         |         |                  |                 |
| Atom                                                                                     | Wyckoff | Atomic coordinates |         |         | $U_{\text{iso}}$ | $O_{\text{cc}}$ |
|                                                                                          |         | $x$                | $y$     | $z$     |                  |                 |
| GO@ $\beta$ -AgMo_5                                                                      |         |                    |         |         |                  |                 |
| Ag                                                                                       | 16d     | 0.12500            | 0.12500 | 0.12500 | 0                | 0.63043         |
| Mo                                                                                       | 8a      | 0.5                | 0.5     | 0.5     | 0.53019          | 1.67128         |
| O                                                                                        | 32e     | 0.23224            | 0.23224 | 0.23224 | 0.43174          | 3.02756         |
| R_parameters: $R_p = 13.5$ ; $R_{\text{wp}} = 17.2$ ; $R_e = 11.5$ and $\chi^2 = 2.23$ . |         |                    |         |         |                  |                 |
| Atom                                                                                     | Wyckoff | Atomic coordinates |         |         | $U_{\text{iso}}$ | $O_{\text{cc}}$ |
|                                                                                          |         | $x$                | $y$     | $z$     |                  |                 |
| GO@ $\beta$ -AgMo_7.5                                                                    |         |                    |         |         |                  |                 |
| Ag                                                                                       | 16d     | 0.12500            | 0.12500 | 0.12500 | 0                | 0.63122         |
| Mo                                                                                       | 8a      | 0.5                | 0.5     | 0.5     | 0.47913          | 1.64652         |
| O                                                                                        | 32e     | 0.23196            | 0.23196 | 0.23196 | 0.34004          | 2.89927         |
| R_parameters: $R_p = 11.6$ ; $R_{\text{wp}} = 15.6$ ; $R_e = 9.50$ and $\chi^2 = 2.69$ . |         |                    |         |         |                  |                 |
| Atom                                                                                     | Wyckoff | Atomic coordinates |         |         | $U_{\text{iso}}$ | $O_{\text{cc}}$ |
|                                                                                          |         | $x$                | $y$     | $z$     |                  |                 |
| GO@ $\beta$ -AgMo_10                                                                     |         |                    |         |         |                  |                 |
| Ag                                                                                       | 16d     | 0.12500            | 0.12500 | 0.12500 | 0                | 0.63268         |
| Mo                                                                                       | 8a      | 0.5                | 0.5     | 0.5     | 0.29312          | 1.64201         |
| O                                                                                        | 32e     | 0.23304            | 0.23304 | 0.23304 | 0.03751          | 2.86663         |
| R_parameters: $R_p = 14.9$ ; $R_{\text{wp}} = 18.1$ ; $R_e = 12.5$ and $\chi^2 = 2.10$ . |         |                    |         |         |                  |                 |
| Atom                                                                                     | Wyckoff | Atomic coordinates |         |         | $U_{\text{iso}}$ | $O_{\text{cc}}$ |
|                                                                                          |         | $x$                | $y$     | $z$     |                  |                 |
| COD no. 7222296                                                                          |         |                    |         |         |                  |                 |
| Ag                                                                                       | 16d     | 0.12500            | 0.12500 | 0.12500 |                  |                 |
| Mo                                                                                       | 8a      | 0.5                | 0.5     | 0.5     |                  |                 |
| O                                                                                        | 32e     | 0.23064            | 0.23064 | 0.23064 |                  |                 |

**Legend:**  $O_{\text{cc}}$  = occupation;  $U_{\text{iso}}$  = Thermic isotropic factor.

**Table S2:** Raman active modes and band position for all prepared samples and reported by literature.

| Modes           | Experimental Raman band position of samples (cm <sup>-1</sup> ) |     |      |      |      |      | Literature            |                       |
|-----------------|-----------------------------------------------------------------|-----|------|------|------|------|-----------------------|-----------------------|
|                 | 0*                                                              | 1*  | 2.5* | 5*   | 7.5* | 10*  | ♠ (cm <sup>-1</sup> ) | ♣ (cm <sup>-1</sup> ) |
| T <sub>2g</sub> | 89                                                              | 98  | 96   | 79   | 86   | 86   | 102                   |                       |
| E <sub>g</sub>  | 273                                                             | 274 | 274  | 273  | 274  | 274  | 296                   |                       |
| T <sub>2g</sub> | 349                                                             | 349 | 347  | 346  | 349  | 349  | 372                   |                       |
| T <sub>2g</sub> | 759                                                             | 759 | 760  | 757  | 758  | 758  | 779                   |                       |
| A <sub>1g</sub> | 871                                                             | 871 | 872  | 871  | 871  | 871  | 894                   |                       |
| D               |                                                                 |     | 1347 | 1349 | 1340 | 1340 |                       | 1325                  |
| G               |                                                                 |     | 1595 | 1581 | 1579 | 1579 |                       | 1589                  |

**Legend:** 0\* =  $\beta$ -AgMo; 1\* = GO@ $\beta$ -AgMo\_1; 2.5\* = GO@ $\beta$ -AgMo\_2.5; 5\* = GO@ $\beta$ -AgMo\_5; 7.5\* = GO@ $\beta$ -AgMo\_7.5; 10\* = GO@ $\beta$ -AgMo\_10; ♠ = Fabbro et al.<sup>55</sup>; and ♣ = Fesenko et al.<sup>56</sup>.
